# Supplementary material for: Borocarbonitride Layers on Titanium Dioxide Nanoribbons for Efficient Photoelectrocatalytic Water Splitting
Source: MDPI journal article supplement (doi:10.3390/ma14195490), 2021-09-23
Supplement: s1 [file s1]

# Borocarbonitride Layers on Titanium Dioxide Nanoribbons for Efficient Photoelectrocatalytic Water Splitting

Nuria Jiménez-Arévalo <sup>1</sup>, Eduardo Flores <sup>2</sup>, Alessio Giampietri <sup>3</sup>, Marco Sbroscia <sup>3</sup>, Maria Grazia Betti <sup>3</sup>, Carlo Mariani <sup>3</sup>, José R. Ares <sup>1</sup>, Isabel J. Ferrer <sup>1,4</sup>, Fabrice Leardini <sup>1,4</sup>

<sup>1</sup> Departamento de Física de Materiales, Universidad Autónoma de Madrid, Campus de Cantoblanco, E-28049 Madrid, Spain

<sup>2</sup> Centro de Nanociencias y Nanotecnología (CNYN), Universidad Nacional Autónoma de México (UNAM), Ensenada, Baja California C.P. 22860, Mexico

<sup>3</sup> Dipartimento di Fisica, Università di Roma 'La Sapienza', I-00185, Italy

<sup>4</sup> Instituto Nicolás Cabrera, Universidad Autónoma de Madrid, Campus de Cantoblanco, E-28049 Madrid, Spain

## Materials and Methods

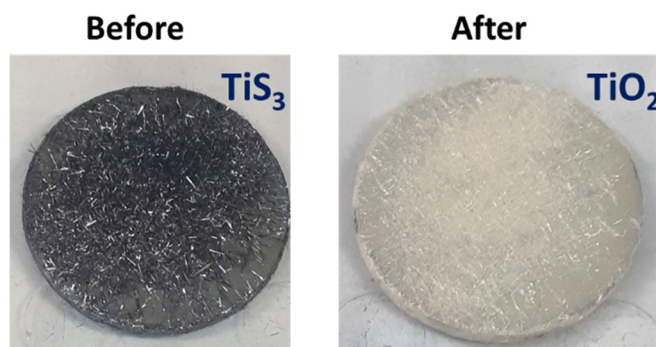

Figure S1. Photograph of a sample before and after the oxidation.

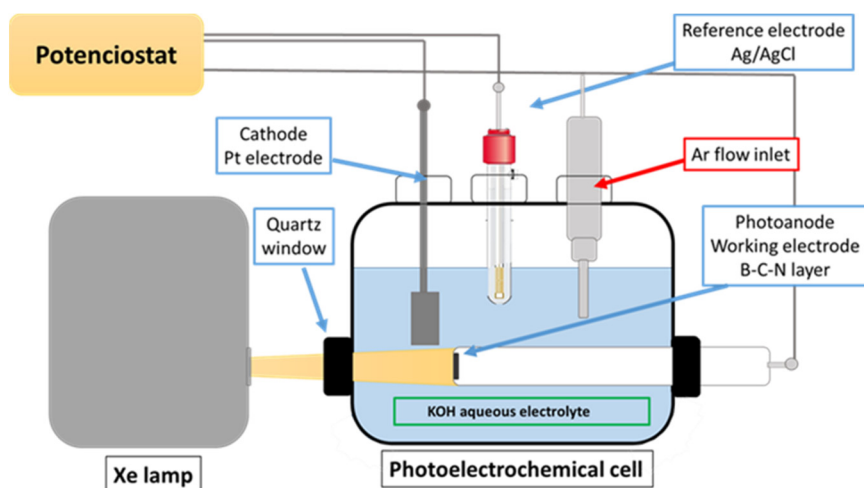

Figure S2. Scheme of the photoelectrochemical cell used in this work.

## Results and Discussion

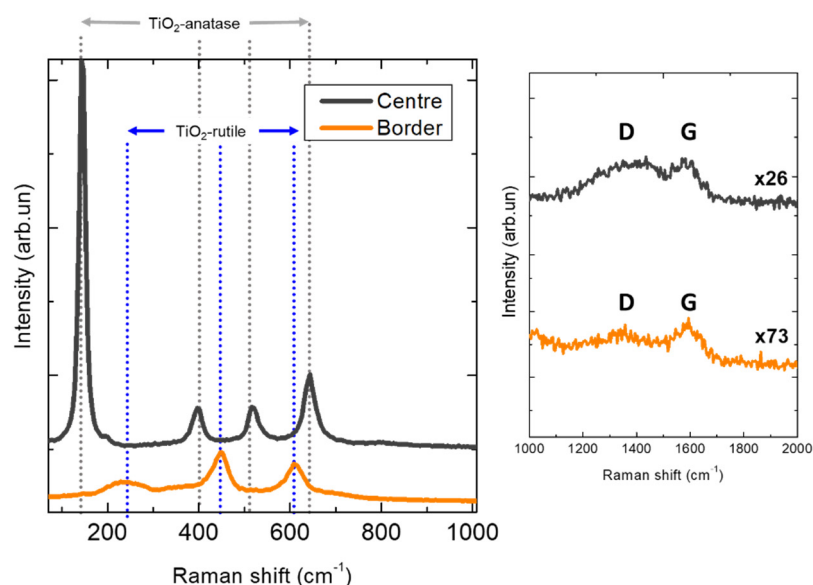

**Figure S3.** Raman spectra of one of the samples with BCN. The spectra has been measured in an external nanoribbon (border) and one in the center of the sample.

**Table S1.** Position (binding energy, BE), full peak width at a half maximum (FWHM) , and relative intensities (with and without oxygen contribution) for the TiO2-BCN and bare TiO2 samples.

| Sample   | Core level | Core level component        | BE (eV) | FWH M (eV) | Area    | Relative intensity (%) | Relative intensity excluding oxygen (%) |
|----------|------------|-----------------------------|---------|------------|---------|------------------------|-----------------------------------------|
| TiO2-BCN | B1s        | B-C                         | 189.40  | 1.21       | 87.52   | 12.39                  | 3.85                                    |
|          |            | B-N                         | 190.87  | 1.95       | 156.62  | 22.17                  | 64.15                                   |
|          |            | B-O                         | 192.70  | 2.45       | 462.40  | 65.45                  |                                         |
|          | C1s        | C-B                         | 282.91  | 1.20       | 25.12   | 2.29                   | 2.53                                    |
|          |            | C-C                         | 284.64  | 1.73       | 849.17  | 77.48                  | 85.47                                   |
|          |            | C-N                         | 285.48  | 1.56       | 120.37  | 10.98                  | 12.10                                   |
|          |            | C-Ox                        | 286.43  | 1.52       | 101.29  | 9.24                   |                                         |
|          | Ti2p       | Ti3+ (Ti2p <sub>3/2</sub> ) | 457.55  | 0.61       | 9.04    | 0.45                   |                                         |
|          |            | Ti4+ (Ti2p <sub>3/2</sub> ) | 459.50  | 1.47       | 1207.50 | 60.77                  |                                         |
|          |            | Ti4+ (Ti2p <sub>1/2</sub> ) | 465.15  | 2.47       | 770.31  | 38.77                  |                                         |
| TiO2     | Ti2p       | Ti4+ (Ti2p <sub>3/2</sub> ) | 459.60  | 1.39       | 5378.50 | 62.31                  |                                         |
|          |            | Ti4+ (Ti2p <sub>1/2</sub> ) | 465.29  | 2.35       | 3253.50 | 37.69                  |                                         |

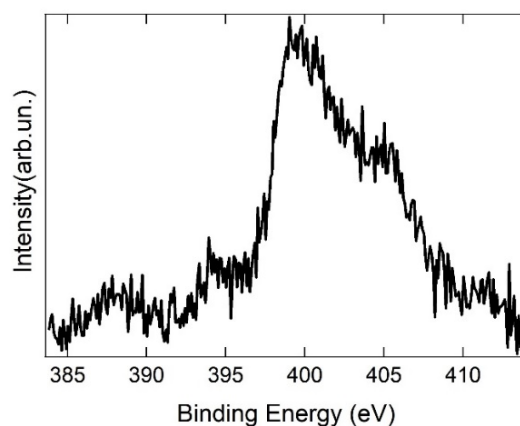

**Figure S4.** XPS measurement between 384eV and 413 eV. N1s is overlapped with a small signal of the Ta4p<sub>3/2</sub> peak, ascribed to the tantalum clips used to fix the sample to the sample holder.

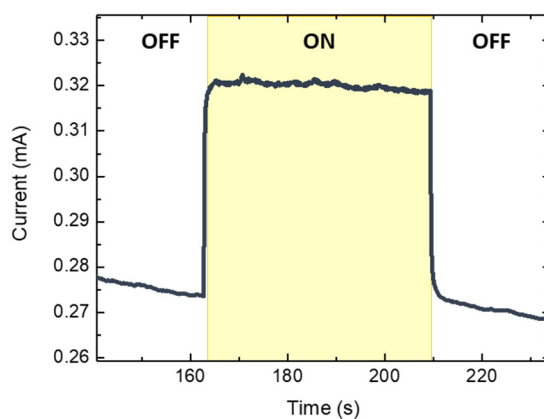

**Figure S5.** Photocurrent of TiO<sub>2</sub>-BCN heterostructure under Xe lamp illumination at 0.6 V vs Ag/AgCl in 0.1 M KOH aqueous solution.

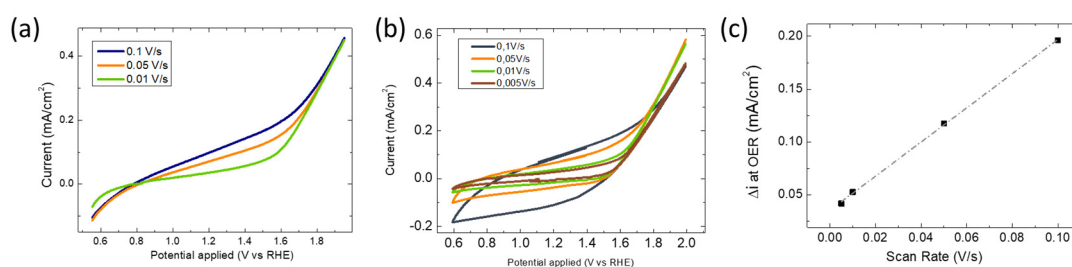

**Figure S6.** (a) LSW at different scan rates (b) CV at different scan rates (c) Difference between the anodic and cathodic current of the CV measurements.

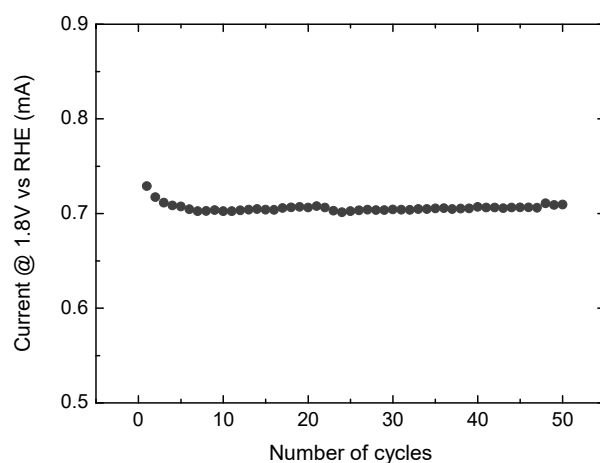

**Figure S7.** To prove the stability of our electrode, series of cyclic voltammetry at 0.05mV/s have been done. This figure shows the current at the maximum potential applied (1.8V vs RHE) for each one of the cycles, for the TiO<sub>2</sub>-BCN sample in 1.0M KOH aqueous electrolyte.

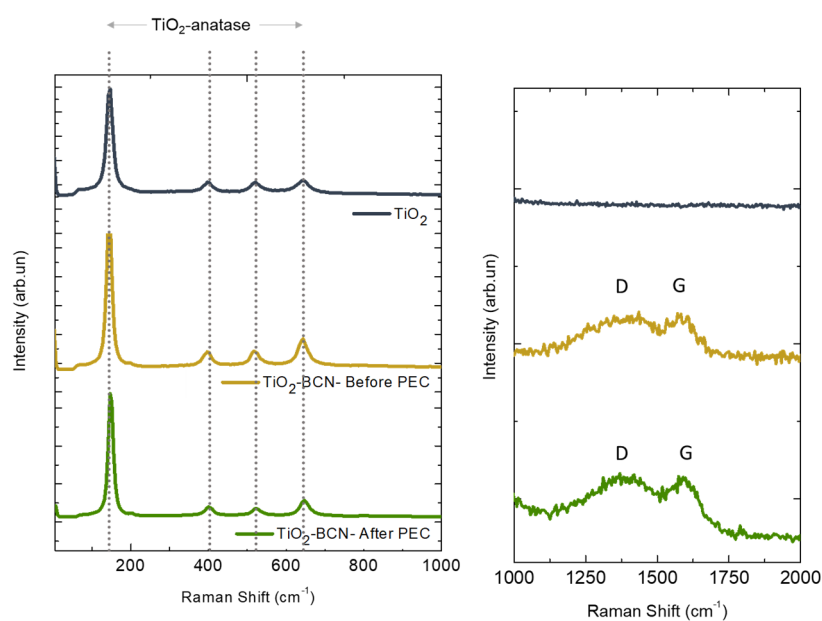

**Figure S8.** Raman spectra of TiO<sub>2</sub> and TiO<sub>2</sub>-BCN before the photoelectrochemical measurements (PEC) and TiO<sub>2</sub>-BCN after the PEC.

**Table S2.** Comparison between TiO<sub>2</sub> and TiO<sub>2</sub>-BCN of the current density in dark condition at 1.85V vs RHE ( $I_{\text{dark}}$ ), photocurrent at 1.85V vs RHE ( $I_{\text{ph}}$ ) and flat band potential.

|                                    | TiO <sub>2</sub>                | TiO <sub>2</sub> -BCN           |
|------------------------------------|---------------------------------|---------------------------------|
| $I_{\text{dark}}$ (@ 1.85V vs RHE) | 0.006 $\mu\text{A}/\text{cm}^2$ | 0.071 $\mu\text{A}/\text{cm}^2$ |
| $I_{\text{ph}}$ (@ 1.85V vs RHE)   | 1.78 $\mu\text{A}$              | 47.6 $\mu\text{A}$              |
| $E_{\text{fb}}$                    | $0.2 \pm 0.1$ V vs RHE          | $0.2 \pm 0.1$ V vs RHE          |

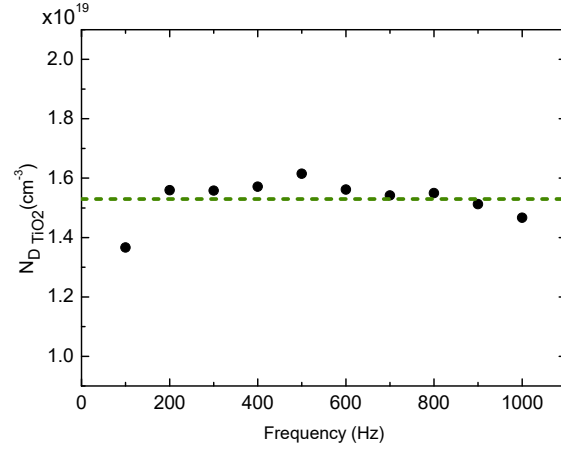

**Figure S9.** Donor density of the TiO<sub>2</sub> sample.

**Table S3.** Fitting parameters of graphs Figure 7c and d, to an exponential decay:  $y = y_0 + A \cdot \exp\left(-\frac{f}{t}\right)$  where  $y$  is the parameter of the Y-axis, and  $f$  is the frequency.

|                                                                                                                                 | $y_0$                         | $A$                           | $t$                        |
|---------------------------------------------------------------------------------------------------------------------------------|-------------------------------|-------------------------------|----------------------------|
| $\frac{\epsilon_{\text{TiO}_2\text{-BCN}} \cdot N_{D\text{TiO}_2\text{-BCN}}}{\epsilon_{\text{TiO}_2} \cdot N_{D\text{TiO}_2}}$ | $7.6 \pm 0.6$                 | $133 \pm 2$                   | $236 \pm 6$                |
| $\epsilon_{\text{TiO}_2\text{-BCN}} \cdot N_{D\text{TiO}_2\text{-BCN}}$                                                         | $(3.0 \pm 0.5) \cdot 10^{22}$ | $(9.3 \pm 0.4) \cdot 10^{23}$ | $(1.5 \pm 0.2) \cdot 10^2$ |
